# Supplementary material for: Persistent Barriers of the Gluten-Free Basic Food Basket: Availability, Cost, and Nutritional Composition Assessment
Source: MDPI journal article supplement (doi:10.3390/nu16060885), 2024-03-19
Supplement: s1 [file s1]

Table S1. List of categories and foods included in the GF-BFB, per portion and calories per day.

|                   | Food                                            | Portion* | Portion<br>per day | Calories<br>per day |
|-------------------|-------------------------------------------------|----------|--------------------|---------------------|
| Bread and Cereals | Rice                                            | g        | 22.2               | 81.1                |
|                   | Oatmeal                                         | g        | 5.1                | 0.1                 |
|                   | Pasta                                           | g        | 20.2               | 26.2                |
|                   | Sweet biscuits                                  | g        | 1.1                | 5.4                 |
|                   | Salted biscuits                                 | g        | 0.5                | 1.9                 |
|                   | Wheat flour (plain)                             | g        | 10.2               | 37                  |
|                   | Bulk bread                                      | g        | 151.2              | 436.9               |
|                   | Prebaked pizza dough (family size)              | g        | 0.8                | 0.1                 |
|                   | Store-bought ready to eat cake (15-20 servings) | g        | 7.2                | 27.2                |
| Meat and Sausages | Sirloin butts                                   | g        | 0.3                | 0.4                 |
|                   | Minced turkey meat                              | g        | 1.2                | 1.4                 |
|                   | Minced beef meat (10% fat)                      | g        | 4.9                | 8.5                 |
|                   | Fresh mussels                                   | g        | 2.7                | 2                   |
|                   | Pork chop                                       | g        | 3.9                | 11.2                |
|                   | Pork ribs                                       | g        | 1.8                | 5.2                 |
|                   | Ham                                             | g        | 9.4                | 25.6                |
|                   | Canned Jack mackerel                            | g        | 18.8               | 52.6                |
|                   | Sausages ( <i>longaniza</i> )                   | g        | 4.2                | 13.5                |
|                   | Fresh or frozen sea bass                        | g        | 8.1                | 6.2                 |
|                   | Veal spread                                     | g        | 2.9                | 12.4                |
|                   | Chicken breast                                  | g        | 4.7                | 9.2                 |
|                   | Whole chicken                                   | g        | 20.4               | 36                  |
|                   | Pork meat                                       | g        | 4                  | 5.2                 |
|                   | Fresh or frozen lamb meat                       | g        | 0.2                | 0.2                 |
|                   | Turkey sausage                                  | g        | 2.3                | 5                   |
|                   | Traditional pork sausage                        | g        | 0.2                | 1.1                 |
|                   | Canned sea food                                 | g        | 0.3                | 0.3                 |
|                   | Chicken drum                                    | g        | 15.3               | 37.9                |
| Dairy and eggs    | Hen egg                                         | g        | 13.1               | 21                  |
|                   | Instant powdered whole milk                     | g        | 3.2                | 15.8                |
|                   | Whole cow's milk                                | ml       | 73.7               | 44.2                |
|                   | Fresh cheese or soft cheese                     | g        | 0.9                | 1                   |
|                   | Cream cheese                                    | g        | 0.3                | 1.1                 |
|                   | Gouda cheese                                    | g        | 4.3                | 15.1                |
|                   | Bulk yogurt (1L)                                | mL       | 20.8               | 17.8                |
| Oils and Fats     | Vegetable oil                                   | mL       | 15.7               | 140.7               |
|                   | Salted butter                                   | g        | 1.2                | 8.8                 |
|                   | Margarine                                       | g        | 3.6                | 25.5                |

|                             |                                                       |    |       |       |
|-----------------------------|-------------------------------------------------------|----|-------|-------|
| Legumes                     | Beans                                                 | g  | 13.1  | 42.8  |
|                             | Lentils                                               | g  | 1.7   | 5.7   |
| Sugar, Coffee, Tea & Snacks | Peanuts (salted)                                      | g  | 0.4   | 2.4   |
|                             | Sugar                                                 | g  | 28.8  | 114.6 |
|                             | Chocolate                                             | g  | 0.9   | 5     |
|                             | Candies                                               | g  | 1.9   | 7.5   |
|                             | Ice-cream (family size, one flavor)                   | mL | 9.3   | 13.1  |
|                             | Tomato sauce                                          | g  | 20.1  | 16.9  |
|                             | Coffee substitute                                     | g  | 1     | 0     |
|                             | Tea leaves                                            | g  | 1.8   | 0     |
| Drinks                      | Mineral water                                         | mL | 9.4   | 0     |
|                             | Soft drinks                                           | mL | 46.9  | 17.7  |
|                             | Energy drink                                          | mL | 0.1   | 0     |
|                             | Isotonic drink                                        | mL | 0.3   | 0     |
|                             | Fresh fruit juice                                     | mL | 4.5   | 2.5   |
|                             | Fruit flavored drink                                  | mL | 0.1   | 0.1   |
|                             | Powdered juice mix                                    | g  | 1.3   | 4.9   |
| Eating Out Products         | Hot dog                                               | g  | 6.4   | 18    |
|                             | Potato chips                                          | g  | 0.8   | 1.3   |
|                             | Regular black tea (for breakfast)                     | g  | 1.3   | 0.3   |
|                             | Breakfast breads and pastries                         | g  | 0.1   | 0.5   |
|                             | Starter (salad o soup for lunch)                      | g  | 0     | 0     |
|                             | Dessert (for lunch)                                   | g  | 0     | 0     |
|                             | Combo fast food                                       | g  | 0.7   | 1.5   |
|                             | Toasts (avocado or butter or jam for breakfast)       | g  | 0     | 0.1   |
|                             | Ham and cheese or steak and cheese sandwich (teatime) | g  | 0     | 0.1   |
|                             | Whole roasted chicken                                 | g  | 2     | 3.7   |
|                             | <i>Empanada</i> (meat pie)                            | g  | 1.5   | 2.9   |
|                             | Daily special (for lunch)                             | g  | 4.5   | 5.1   |
|                             | Main course (for lunch)                               | g  | 0.8   | 1.5   |
| Fruits and Vegetables       | Banana                                                | g  | 110.2 | 100.5 |
|                             | Apple                                                 | g  | 51.1  | 30.2  |
|                             | Lettuce                                               | g  | 25.2  | 3.3   |
|                             | Pumpkin                                               | g  | 14.2  | 4.5   |
|                             | Lemon                                                 | g  | 15.7  | 4.6   |
|                             | Avocado                                               | g  | 12.5  | 20.1  |
|                             | Tomato                                                | g  | 44.6  | 9.4   |
|                             | Carrots                                               | g  | 6.3   | 2.7   |
|                             | Onions                                                | g  | 17.5  | 6.6   |
|                             | Corn (frozen)                                         | g  | 5.7   | 4.6   |
|                             | Potato                                                | g  | 121.5 | 218.5 |
